# Supplementary material
Source: ML conference proceedings conference paper supplement (https://aclanthology.org/2026.bionlp-2.9)

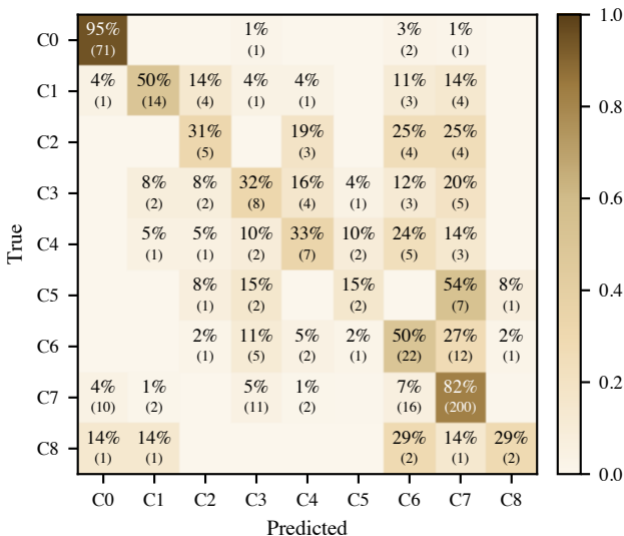

Supplement: SupplementaryMaterial [file confusion_9v.pdf › figures/confusion_9v.pdf]

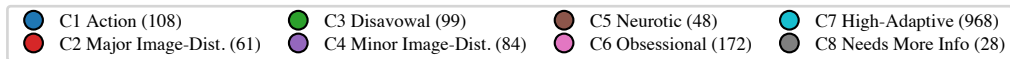

(a) Min-LR 8c

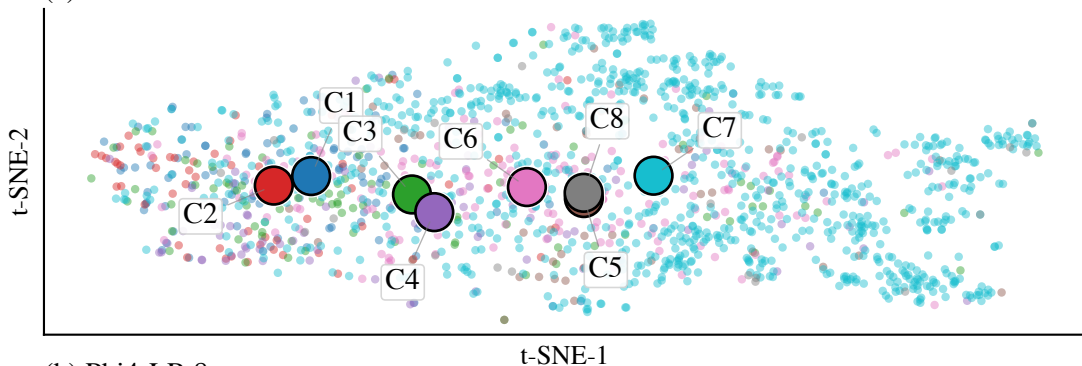

(b) Phi4-LR 8c

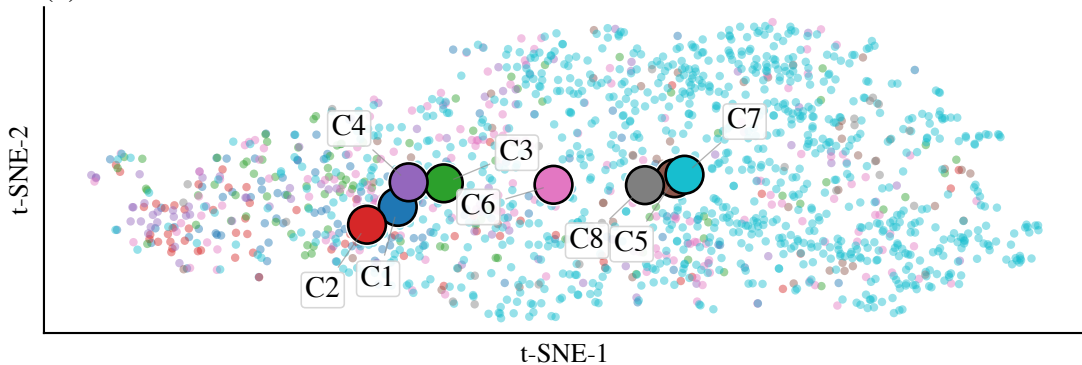

Supplement: SupplementaryMaterial [file emb_8c_subplot.pdf › figures/emb_8c_subplot.pdf]

t-SNE-2

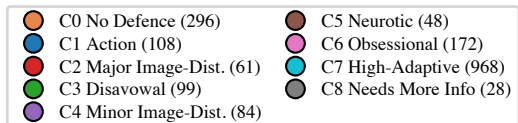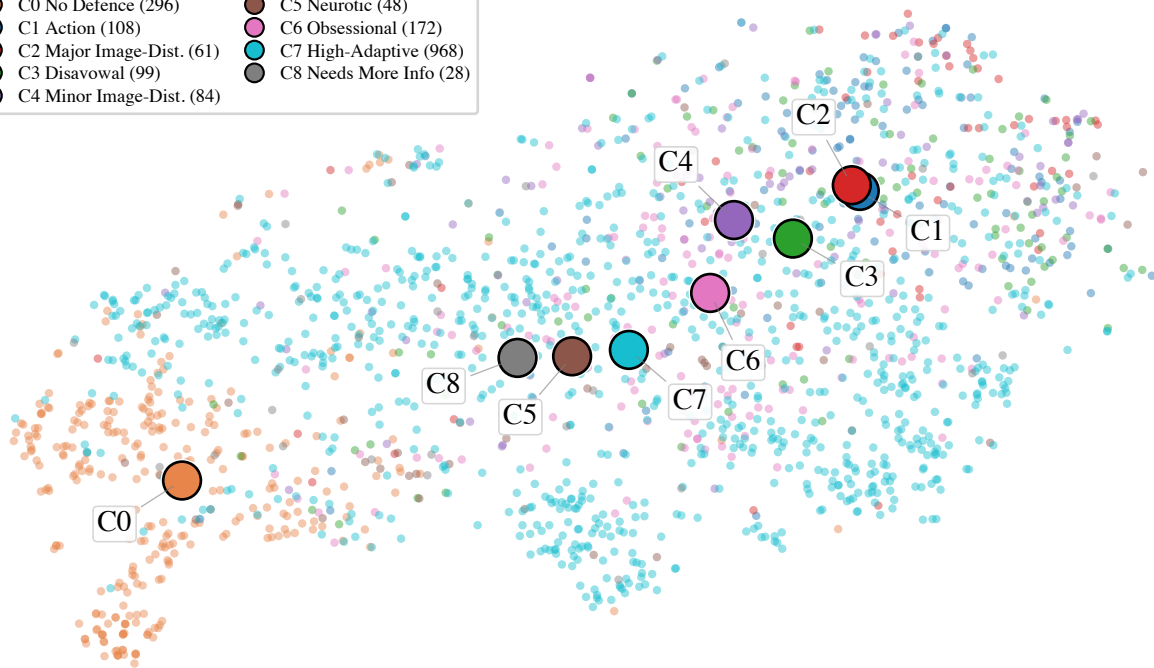

t-SNE-1

Supplement: SupplementaryMaterial [file emb_9c_perclass.pdf › figures/emb_9c_perclass.pdf]

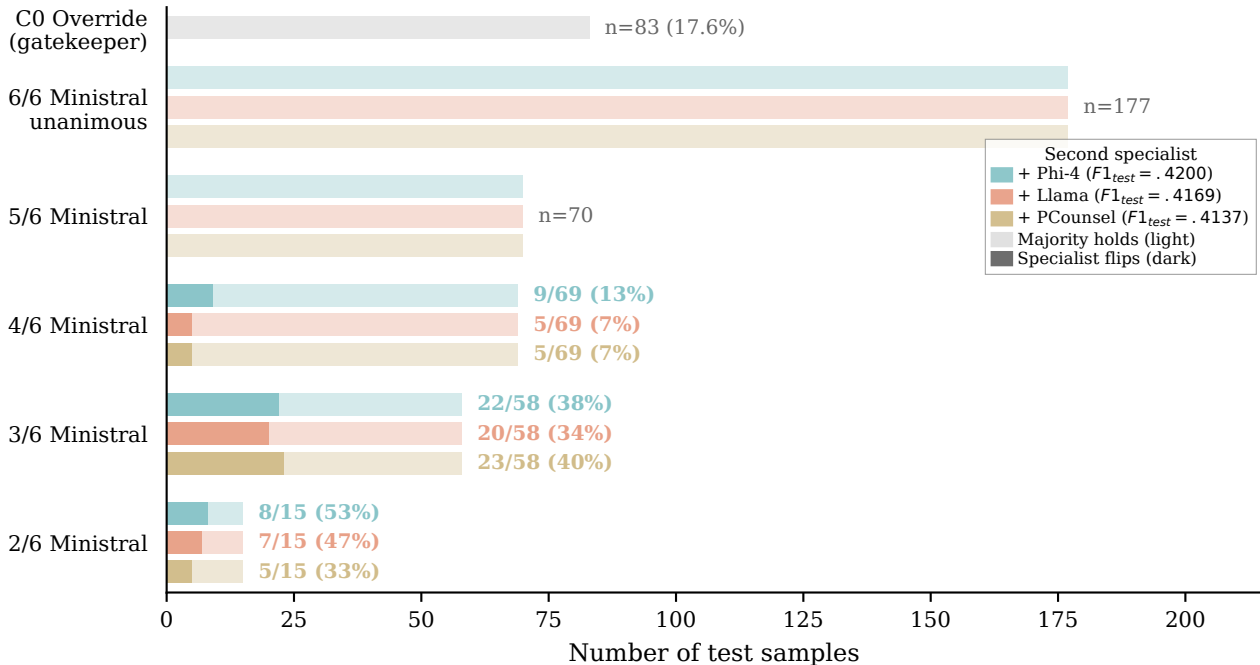

Supplement: SupplementaryMaterial [file voting_flow_3spec.pdf › figures/voting_flow_3spec.pdf]
